# Supplementary material for: The decoration of specialized metabolites influences stylar development
Source: eLife journal article supplement (doi:10.7554/elife.38611), 2018-10-05
Supplement: supp [file elife-38611-supp-v1.zip]

Archive with 30 entries (30 files):
- elife_poa_e38611_Figure_3_source_data_4.xlsx
- elife_poa_e38611_Figure_3_source_data_3.xlsx
- elife_poa_e38611_Figure_1_source_data_2.xlsx
- elife_poa_e38611_Figure_4_source_data_2.xlsx
- elife_poa_e38611_Figure_3_source_data_1.xlsx
- elife_poa_e38611_Supplementary_File_2.docx
- elife_poa_e38611_Figure_3_figure_supplement_3.tif
- elife_poa_e38611_Figure_1_figure_supplement_2.tif
- elife_poa_e38611_Figure_6_figure_supplement_1.tif
- elife_poa_e38611_Figure_3_source_data_2.xlsx
- elife_poa_e38611_Figure_5_figure_supplement_2.tif
- elife_poa_e38611_Figure_3_figure_supplement_2.tif
- elife_poa_e38611_Figure_1_figure_supplement_1.tif
- elife_poa_e38611_Figure_6_source_data_2.xlsx
- elife_poa_e38611_Supplementary_File_1.docx
- elife_poa_e38611_Figure_4_source_data_1.xlsx
- elife_poa_e38611_Figure_2_source_data_1.xlsx
- elife_poa_e38611_Figure_4_figure_supplement_1.tif
- elife_poa_e38611_Figure_1_source_data_1.xlsx
- elife_poa_e38611_Figure_5_source_data_2.xlsx
- elife_poa_e38611_Figure_5_figure_supplement_1.tif
- elife_poa_e38611_Figure_4_figure_supplement_2.tif
- elife_poa_e38611_Figure_6_source_data_1.xlsx
- elife_poa_e38611_Figure_5_source_data_3.xlsx
- elife_poa_e38611_Transparent_Reporting_File.pdf
- elife_poa_e38611_Figure_3_figure_supplement_1.tif
- elife_poa_e38611_Figure_5_source_data_1.xlsx
- elife_poa_e38611_Figure_4_source_data_3.xlsx
- elife_poa_e38611_Figure_2_figure_supplement_1.tif
- elife_poa_e38611_Supplementary_File_3.docx
