# Supplementary material for: The decoration of specialized metabolites influences stylar development
Source: eLife journal article supplement (doi:10.7554/elife.38611), 2018-10-05
Supplement: supp [file elife-38611-supp-v1.zip › elife_poa_e38611_Figure_1_source_data_1.xlsx]

## Sheet: Tabelle1
	Figure 1-Source data 1. DTGs profiles and its malonylation percentages under different treatments and developmental stages.
Figure 1B	Insert		Total DTGs
		Con	6.81823e+09	3.2108e+08
		W+OS	9.30441e+09	2.52379e+08
			Con		W+OS
		Core	2.66755e+08	1.09323e+08	3.99627e+08	6.59172e+07
		Monomalonylated	2.01863e+09	1.44164e+08	3.17228e+09	1.36431e+08
		Dimalonylated	3.86868e+09	1.46168e+08	4.87451e+09	9.98153e+07
		Trimalonylated	6.64161e+08	5.74711e+07	8.35463e+08	2.7567e+07
Figure 1C			Total DTGs
		Stage 1	5.35494e+10	1.15856e+09
		Stage 3	3.83837e+10	9.95312e+08
		Stage 5	3.2429e+10	1.52763e+09
Figure 1E			malonylation percentage
		Con	172.87	4.45957
		W+OS	166.041	2.28293
Figure 1F			malonylation percentage
		Stage 1	168.12	1.00781
		Stage 3	168.224	0.984772
		Stage 5	160.854	3.63447
