# Supplementary material for: The decoration of specialized metabolites influences stylar development
Source: eLife journal article supplement (doi:10.7554/elife.38611), 2018-10-05
Supplement: supp [file elife-38611-supp-v1.zip › elife_poa_e38611_Figure_1_source_data_2.xlsx]

## Sheet: Tabelle1
			Figure 1-Source data 2. DTGs profiles and its malonylation percentages in different tissues.
Figure 1-Figure supplement 1
		B	C	D	E	F	G
	Tissue	core	monomalonylated	dimalonylated	trimalonylated	Total DTGs/g	malonlated degree
	ANT	730773	8.01157e+06	1.87309e+07	1.02015e+06	2.84934e+07	170.334
	BUD	2.79785e+06	1.71129e+07	2.96622e+07	1.38463e+06	5.09575e+07	158.153
	COR	1.63277e+06	8.37435e+06	1.89375e+07	359454	2.93041e+07	161.506
	FIL	483845	5.62531e+06	1.55305e+07	668742	2.23084e+07	173.444
	LEA	1.30495e+06	8.11201e+06	1.7066e+07	831190	2.73141e+07	163.789
	LIM	6.11151e+06	1.87394e+07	2.22712e+07	679264	4.78014e+07	136.648
	NEC	2.18773e+06	1.68246e+07	3.43664e+07	1.24067e+06	5.46194e+07	163.457
	OVA	3.48462e+06	2.11584e+07	3.56559e+07	982418	6.12813e+07	155.704
	PED	246688	2.71576e+06	7.84821e+06	1.1952e+06	1.20059e+07	183.225
	ROO	506345	3.52809e+06	1.02839e+07	246135	1.45644e+07	170.513
	SEE	105712	831278	3.15787e+06	35192.7	4.13005e+06	175.605
	SEP	1.12304e+06	3.91886e+06	5.24813e+06	1.09869e+06	1.13887e+07	155.515
	STE	5577.2	42170.3	306610	129869	484226	215.808
	STY	1.0746e+06	1.04398e+07	2.39789e+07	169290	3.56626e+07	165.175
	CV	106.971	77.5464	64.5165	63.9249	67.6412	10.5738
