# Supplementary material for: The decoration of specialized metabolites influences stylar development
Source: eLife journal article supplement (doi:10.7554/elife.38611), 2018-10-05
Supplement: supp [file elife-38611-supp-v1.zip › elife_poa_e38611_Figure_2_source_data_1.xlsx]

## Sheet: Tabelle1
		Figure 2-Source data 1. Relative transcript abundance of DTG biosynthesis genes in N. attenuata.
Figure 2B	Gene_id	LEC	LET	STT	COE	STI	SNP	STO	STS	NEC	ANT	OVA	PED	COL	OFL	FLB	ROT
	NIATv7_g13429	26.22	782.27	76.86	14.12	1.59	5.15	7.11	7.89	19.25	5.26	43.07	3.49	5.14	9.05	99.6	0.32
	NIATv7_g34586	16.58	24.84	1.9	0.72	0.35	0.35	0.11	0.42	0.54	0.05	0.16	0.73	0.69	0.99	0.17	0.05
	NIATv7_g22417	0.12	3.63	9.41	0.09	0	0.47	0.69	0.34	0	0.05	0.21	1.23	0	0	0.29	0.01
	NIATv7_g21823	0.1	0.18	34.43	534.83	213.66	300.52	189.91	233.66	295.61	33.58	357.07	78.99	657.25	541.12	28.82	0.14
	NIATv7_g39356	0.63	5.65	4.64	120.63	85.27	150.3	132.35	137.84	303.98	52.96	59.43	4.05	172.16	185.27	25.46	0.14
	NaGGPPS	81.47	571.45	39.13	25.91	11.48	5.9	3.74	4.9	23	2.58	54.69	25.61	7.87	13.32	191.87	7.77
	NaGLS	232.48	2783.78	1.75	1.03	1.05	0	0.12	0	9.11	0.57	19.14	2.73	0.17	0.44	315.43	0.32
	NaGT1	563.32	2577.23	50.14	54.67	5.44	0.11	0.25	0.41	10.35	3.9	47.91	30.19	0.36	0.45	578.56	1.95
	NaGT2	3.28	36.79	0.88	5.77	0.61	1.28	0.43	0.52	3.5	0.62	4.01	3.49	1.4	2.67	6.18	17
	NaRT1	114.71	1480.29	2.85	142.29	2.78	0	0.21	0.09	59.39	8.55	149.49	10.18	17.48	15.5	709.83	0.33
Figure 2D
			0h		5h		9h
		NaMT1	7.26667	1.22782	431.047	30.3404	288.597	16.4668
		NaMT2	0.493333	0.0762306	0.17	0.0550757	0.02	0.02
		NaMT3	16.55	2.28745	7.97667	1.49557	2.25333	0.258607
