# Supplementary material for: The decoration of specialized metabolites influences stylar development
Source: eLife journal article supplement (doi:10.7554/elife.38611), 2018-10-05
Supplement: supp [file elife-38611-supp-v1.zip › elife_poa_e38611_Figure_3_source_data_1.xlsx]

## Sheet: Tabelle1
			Figure 3-Source data 1. Silencing NaMaT1 expression dramatically shortens style lengths by decreasing cell size rather than cell number in a GGPPS-dependent manner.
Figure 3C			Style cell length
		EV-EV	297.541	20.3456
		EV-MaT1	130.149	13.5467
		irGGPPS-EV	288.529	7.618
		irGGPPS-MaT1	268.739	9.67062
Figure 3D			Cell number per style
		EV-EV	77	1.51658
		EV-MaT1	77.3333	1.14504
		irGGPPS-EV	76.8333	1.35195
		irGGPPS-MaT1	78.3333	1.05409
Figure 3E			Style length
		EV-EV	23.3333	0.509175
		EV-MaT1	9.55556	0.562183
		irGGPPS-EV	20.5	0.567646
		irGGPPS-MaT1	20	0.988826
