# Supplementary material for: The decoration of specialized metabolites influences stylar development
Source: eLife journal article supplement (doi:10.7554/elife.38611), 2018-10-05
Supplement: supp [file elife-38611-supp-v1.zip › elife_poa_e38611_Figure_3_source_data_2.xlsx]

## Sheet: Tabelle1
	Figure 3-Source data 2. Effect of silencing NaMaT1 on gene expression in leaves.
Figure 3-Figure supplement 1A
		NaMaT1		NaMaT2		NaMaT3
	VIGS-EV	1	0.220145	1	0.0681378	1	0.196647
	VIGS-MaT1	0.190541	0.0202571	1.23427	0.164256	1.31894	0.392312
Figure 3-Figure supplement 1B		NaGGPPS		NaGLS
	VIGS-EV	1	0.224193	1	0.205106
	VIGS-MaT1	1.31613	0.16977	1.81639	0.203495
