# Supplementary material for: The decoration of specialized metabolites influences stylar development
Source: eLife journal article supplement (doi:10.7554/elife.38611), 2018-10-05
Supplement: supp [file elife-38611-supp-v1.zip › elife_poa_e38611_Figure_3_source_data_3.xlsx]

## Sheet: Tabelle1
	Figure 3-Source data 3. VIGS of NaMaT1 affects the fertility of N. attenuata plants.
Figure 3-Figure supplement 2A		Capsule number
	EV-EV	17.5	1.9105
	EV-MaT1	0.5	0.223607
	irGGPPS-EV	8.8	1.15758
	irGGPPS-MaT1	5.83333	0.542627
Figure 3-Figure supplement 2C	♀	♂	Seed numbers
	VIGS-EV	VIGS-EV	205.75	6.45282
	VIGS-EV	VIGS-MaT2	158.75	23.4254
	VIGS-MaT1	VIGS-EV	16.3333	3.52767
	VIGS-MaT2	VIGS-MaT2	0	0
Figure 3-Figure supplement 2D	♀	♂	Germinate rate
	VIGS-MaT1	VIGS-EV	58.3333	8.33333
	VIGS-MaT2	VIGS-MaT2	0	0
	VIGS-EV	VIGS-EV	61.127	3.08611
	VIGS-EV	VIGS-MaT2	63.448	1.73533
