# Supplementary material for: The decoration of specialized metabolites influences stylar development
Source: eLife journal article supplement (doi:10.7554/elife.38611), 2018-10-05
Supplement: supp [file elife-38611-supp-v1.zip › elife_poa_e38611_Figure_3_source_data_4.xlsx]

## Sheet: Tabelle1
	Figure 3-Source data 4. VIGS of NaMaT1 in both irGGPPS and irAOC backgrounds did not affect NaYUC-like 2 transcript accumulation in styles.
Figure 3-Figure supplement 3A		NaMaT1
	EV-EV	1.03074	0.11246
	EV-MaT1	0.11244	0.01057
	irGGPPS-EV	0.58673	0.06071
	irGGPPS-MaT1	0.2136	0.07496
Figure 3-Figure supplement 3B		NaYUC-like 2
	EV-EV	1.04992	0.137048
	EV-MaT1	1.38583	0.137126
	irGGPPS-EV	2.09753	0.199728
	irGGPPS-MaT1	1.81335	0.220305
Figure 3-Figure supplement 3C		NaMaT1
	EV-EV	1.07473	0.156375
	EV-MaT1	0.185878	0.0264537
	irAOC-EV	1.28099	0.138509
	irAOC-MaT1	0.21624	0.0495804
Figure 3-Figure supplement 3D		NaYUC-like 2
	EV-EV	1.05225	0.125587
	EV-MaT1	1.24271	0.0818281
	irAOC-EV	0.911037	0.225873
	irAOC-MaT1	1.11754	0.170662
