# Supplementary material for: The decoration of specialized metabolites influences stylar development
Source: eLife journal article supplement (doi:10.7554/elife.38611), 2018-10-05
Supplement: supp [file elife-38611-supp-v1.zip › elife_poa_e38611_Figure_4_source_data_1.xlsx]

## Sheet: Tabelle1
		Figure 4-Source data 1. Silencing NaMaT1 influences DTG profiles and malonylation percentages across all tissues, but alters JAs and IAA specifically in flowers.
Figure 4A	DTGs										Malonylation percentage				JAs						IAA
		Core		Mono-M		Di-M		Tri-M				Malonylation percentage				VIGS-EV		VIGS-MaT1				IAA content
	VIGS-EV	6.20876e+07	1.22901e+07	8.41018e+08	1.46985e+08	2.39095e+09	1.83345e+08	1.57474e+08	2.32274e+07		VIGS-EV	177.523	2.75233		JA	10.6129	2.11895	12.2499	1.74074		VIGS-EV	1.32205	0.131931
	VIGS-MaT1	2.87625e+08	7.2776e+07	1.83484e+09	3.56053e+08	2.55036e+09	1.47229e+08	1.39691e+08	1.64641e+07		VIGS-MaT1	155.121	5.06503		JA Ile	0	0	0	0		VIGS-MaT1	1.27457	0.115864
Figure 4B		Core		Mono-M		Di-M		Tri-M				Malonylation percentage				VIGS-EV		VIGS-MaT1				IAA content
	VIGS-EV	5.27078e+08	1.03035e+08	2.86974e+09	3.49813e+08	3.36054e+09	9.58428e+07	1.42735e+08	1.83312e+07		VIGS-EV	146.871	5.33598		JA	220.283	58.9861	515.543	119.626		VIGS-EV	1.23377	0.0671713
	VIGS-MaT1	1.75219e+09	2.93474e+08	4.43607e+09	4.7233e+08	3.11407e+09	2.05679e+08	1.04419e+08	1.66426e+07		VIGS-MaT1	118.081	3.26482		JA-Ile	0	0	0	0		VIGS-MaT1	1.26003	0.109092
Figure 4C		Core		Mono-M		Di-M		Tri-M				Malonylation percentage				VIGS-EV		VIGS-MaT1				IAA content
	VIGS-EV	1.0448e+09	4.16372e+07	8.63824e+09	3.69115e+08	2.28376e+10	9.89259e+08	8.10769e+08	4.34484e+07		VIGS-EV	170.201	0.635982		JA	276.191	26.9988	174.333	23.5365		VIGS-EV	13.8809	0.733744
	VIGS-MaT1	6.48725e+09	2.53178e+08	1.12156e+10	2.24953e+08	1.38805e+10	2.98517e+08	4.23147e+08	2.64145e+07		VIGS-MaT1	125.846	1.17524		JA-Ile	104.47	15.1021	30.1317	8.84661		VIGS-MaT1	16.9413	2.53957
Figure 4D		Core		Mono-M		Di-M		Tri-M				Malonylation percentage				VIGS-EV		VIGS-MaT1				IAA content
	VIGS-EV	3.35948e+07	4.3024e+06	8.25051e+08	7.58712e+07	6.5454e+09	3.25048e+08	6.63911e+06	927063		VIGS-EV	188.255	0.506948		JA	35.0544	7.24508	61.9057	9.79924		VIGS-EV	24.9974	1.6705
	VIGS-MaT1	8.43875e+08	8.67002e+07	4.38555e+09	3.35573e+08	4.93969e+09	3.83333e+08	0	0		VIGS-MaT1	140.367	0.836146		JA-Ile	27.5198	10.6978	2.51722	1.12516		VIGS-MaT1	14.9937	1.23274
