# Supplementary material for: The decoration of specialized metabolites influences stylar development
Source: eLife journal article supplement (doi:10.7554/elife.38611), 2018-10-05
Supplement: supp [file elife-38611-supp-v1.zip › elife_poa_e38611_Figure_4_source_data_2.xlsx]

## Sheet: Tabelle1
	Figure 4-Source data 2. DTG profiles in VIGS plants having irGGPPS, irAOC, or EV backgrounds.
Figure 4-Figure supplement 1A			VIGS-EV		VIGS-MaT1		P value
	Core	Lyciumoside I	172576	41642.3	5.61272e+07	1.23002e+07	0.00389548
	Core	Lyciumoside II	72539.4	39758.2	4.53978e+08	5.06132e+07	0.000107397
	Core	Lyciumoside IV	2.55026e+07	3.39536e+06	2.64064e+08	2.43943e+07	5.50479e-05
	Core	Attenoside	7.84708e+06	964153	6.97057e+07	8.73012e+06	0.000368139
	Monomalonylated DTG	Nicotianoside IX	3.58189e+06	751514	1.52369e+08	3.2666e+07	0.000134171
	Monomalonylated DTG	Nicotianoside XI	6.5917e+06	886590	5.05762e+08	6.3397e+07	0.000221911
	Monomalonylated DTG	Nicotianoside I	5.87953e+08	5.7123e+07	2.89661e+09	1.88637e+08	6.65667e-06
	Monomalonylated DTG	Nicotianoside IV	8.27335e+06	891890	4.41851e+06	1.26146e+06	0.0291372
	Monomalonylated DTG	Nicotianoside VI	2.18651e+08	1.68691e+07	7.84174e+08	7.46728e+07	0.000198947
	Dimalonylated DTG	Nicotianoside X	6.55361e+07	7.32142e+06	6.44733e+07	8.40376e+06	0.925489
	Dimalonylated DTG	Nicotianoside XII	1.18132e+08	9.20893e+06	3.72807e+08	4.7446e+07	0.00150159
	Dimalonylated DTG	Nicotianoside II	5.17892e+09	2.49797e+08	3.12397e+09	2.29401e+08	2.98443e-05
	Dimalonylated DTG	Nicotianoside V	1.043e+08	9.41504e+06	3.88289e+07	4.38176e+06	5.47261e-05
	Dimalonylated DTG	Nicotianoside VII	1.07851e+09	5.58519e+07	1.33961e+09	1.09516e+08	0.0624249
	Trimalonylated DTG	Nicotianoside XIII	261409	59929.9	0	0	0.00240644
	Trimalonylated DTG	Nicotianoside VIII	6.3777e+06	884301	0	0	9.13608e-05	Student t-test
	X50	Nicotianoside XIII	1.30705e+07	2.9965e+06	0	0
	X50	Nicotianoside VIII	3.18885e+08	4.4215e+07	0	0
Figure 4-Figure supplement 1B			EV-EV		EV-MT1		irGGPPS-EV		irGGPPS-MT1		EV-EV	EV-MaT1	irGGPPS-EV	irGGPPS-MaT1
	Core	Lyciumoside I	227.86	10.3948	2677.99	114.404	127.03	88.0921	928.85	103.019	c	a	c	b
	Core	Lyciumoside II	37.2055	3.70034	1874.68	63.7607	27.8587	3.95138	488.15	62.9717	c	a	c	b
	Core	Lyciumoside IV	515.47	23.9812	1315.37	81.2416	213.075	56.7817	538.01	52.1617	b	a	c	b
	Core	Attenoside	261.908	18.5483	615.4	36.9475	150.421	13.3861	224.99	16.4258	b	a	c	b
	Monomalonylated DTG	Nicotianoside IX	534.628	35.3426	1252.25	38.6995	137.844	33.1951	481.919	42.3441	b	a	c	b
	Monomalonylated DTG	Nicotianoside XI	286.871	26.5302	1012.37	20.6269	193.103	32.9068	446.693	30.5043	c	a	d	b
	Monomalonylated DTG	Nicotianoside I	4094.77	312.301	4037.64	98.2098	1697.03	187.978	3231.69	207.732	a	a	c	b
	Monomalonylated DTG	Nicotianoside IV	259.215	13.0743	122.793	8.96827	92.362	7.44207	77.2251	4.24179	a	b	bc	c
	Monomalonylated DTG	Nicotianoside VI	3462.76	122.191	4790.5	121.072	2019.02	81.4733	2684.04	133.065	b	a	d	c
	Dimalonylated DTG	Nicotianoside X	2164.3	83.5001	784.135	32.3259	566.991	40.0731	397.543	35.6764	a	b	c	d
	Dimalonylated DTG	Nicotianoside XII	2359.1	188.156	1592.87	62.3165	1258.88	89.2831	1183.13	44.6298	a	b	bc	c
	Dimalonylated DTG	Nicotianoside II	9630.69	725.582	4912.85	144.671	4676.96	168.364	3956.78	83.1668	a	b	b	b
	Dimalonylated DTG	Nicotianoside V	792.766	59.6735	90.2707	8.27622	255.963	23.0353	106.391	12.3029	a	c	b	c
	Dimalonylated DTG	Nicotianoside VII	7890.76	137.475	6500.39	161.965	5292.77	154.969	4365.91	84.9169	a	b	c	d
	Trimalonylated DTG	Nicotianoside XIII	243.564	12.6125	120.94	8.75325	272.06	40.4199	151.098	18.3273	a	b	a	b
	Trimalonylated DTG	Nicotianoside VIII	567.205	33.86	302.207	19.7891	479.573	48.0528	284.299	17.4344	a	b	a	b	P < 0.05, one-way ANOVA by Tukey’s HSD post-hoc tests
Figure 4-Figure supplement 1C			EV-EV		EV-MaT1		irAOC-EV		irAOC-MaT1		EV-EV	EV-MaT1	irAOC-EV	irAOC-MaT1
	Core	Lyciumoside I	0	0	1.38498e+09	9.60835e+08	5.13857e+06	5.13857e+06	2.16607e+08	1.84351e+08	a	a	a	a
	Core	Lyciumoside II	0	0	3.57233e+09	1.69102e+08	0	0	1.74701e+09	4.49923e+08	c	a	c	b
	Core	Lyciumoside IV	1.12035e+08	2.92735e+07	1.63762e+09	7.42263e+07	3.75355e+07	1.07146e+07	7.82841e+08	1.63578e+08	c	a	c	b
	Core	Attenoside	3.57013e+07	6.73368e+06	2.76545e+08	3.94848e+07	4.38235e+07	6.42104e+06	2.25942e+08	5.10272e+07	b	a	b	a
	Monomalonylated DTG	Nicotianoside IX	0	0	7.60238e+08	3.38871e+08	6.91443e+06	6.91443e+06	1.4603e+08	1.03335e+08	a	a	a	a
	Monomalonylated DTG	Nicotianoside XI	7.80806e+07	1.46148e+07	3.5515e+09	1.72964e+08	1.74437e+08	1.76459e+07	2.51829e+09	2.66014e+08	c	a	c	b
	Monomalonylated DTG	Nicotianoside I	2.20261e+09	1.97201e+08	7.65997e+09	1.19996e+08	1.28303e+09	1.2522e+08	6.40184e+09	2.96917e+08	c	a	d	b
	Monomalonylated DTG	Nicotianoside IV	3.33541e+07	1.08379e+07	3.88317e+06	3.88317e+06	3.15052e+07	5.45356e+06	1.55426e+07	7.035e+06	a	a	a	a
	Monomalonylated DTG	Nicotianoside VI	4.60029e+08	3.28097e+07	1.0876e+09	6.34646e+07	1.2218e+09	1.06162e+08	1.45635e+09	2.03728e+07	c	b	ab	a
	Dimalonylated DTG	Nicotianoside X	1.48562e+08	1.6722e+07	3.74215e+08	7.17275e+07	4.70096e+07	1.97926e+07	8.97355e+07	3.3023e+07	b	a	b	b
	Dimalonylated DTG	Nicotianoside XII	1.74396e+08	1.08502e+07	8.3936e+08	4.99248e+07	1.64924e+08	3.60622e+07	5.73089e+08	2.17449e+07	c	a	c	b
	Dimalonylated DTG	Nicotianoside II	6.22196e+09	1.43104e+08	4.308e+09	3.13327e+08	6.84423e+09	7.16646e+08	4.09851e+09	8.06815e+08	ab	b	a	b
	Dimalonylated DTG	Nicotianoside V	2.16776e+08	1.76074e+07	4.66668e+07	5.08444e+06	2.57401e+08	1.38306e+07	4.83523e+07	2.2462e+07	a	b	a	b
	Dimalonylated DTG	Nicotianoside VII	8.76243e+08	4.12806e+07	1.07395e+09	3.58714e+07	2.06366e+09	2.89434e+08	1.48574e+09	1.73312e+08	b	b	a	ab
	Trimalonylated DTG	Nicotianoside XIII	3.70337e+06	3.70337e+06	0	0	0	0	0	0	a	a	a	a
	Trimalonylated DTG	Nicotianoside VIII	2.03349e+07	5.01526e+06	5.17808e+06	941421	5.03874e+07	6.7192e+06	8.35196e+06	3.90139e+06	b	b	a	b	P < 0.05, one-way ANOVA by Tukey’s HSD post-hoc tests
	X50	Nicotianoside XIII	1.85168e+08	1.85168e+08	0	0	0	0	0	0
	X50	Nicotianoside VIII	1.01675e+09	2.50763e+08	2.58904e+08	4.7071e+07	2.51937e+09	3.3596e+08	4.17598e+08	1.9507e+08
