# Supplementary material for: The decoration of specialized metabolites influences stylar development
Source: eLife journal article supplement (doi:10.7554/elife.38611), 2018-10-05
Supplement: supp [file elife-38611-supp-v1.zip › elife_poa_e38611_Figure_4_source_data_3.xlsx]

## Sheet: Tabelle1
	Figure 4-Source data 3. IAA and DTGs accumulate in high concentrations in the gynoecium.
Figure 4-Figure supplement 2B		IAA (ng/g FM)
	S1-leaf	2.69047	0.49399
	Sepal	2.66103	0.215365
	Corolla	3.01118	0.15448
	Stamen	8.36153	0.495985
	Ovary	15.117	0.872159
	Style	19.4798	0.865609
Figure 4-Figure supplement 2C		Core		Mono-M		Di-M		Tri-M
	S1-leaf	4.23148e+08	1.17242e+08	6.2471e+09	2.96401e+08	7.1387e+09	3.86083e+08	4.0121e+08	5.15489e+07
	Sepal	4.1841e+08	5.15426e+07	8.25527e+08	1.1986e+08	1.02198e+09	1.95358e+08	2.67034e+08	1.86456e+07
	Corolla	1.08835e+09	8.06202e+07	2.7549e+09	2.27513e+08	2.05346e+09	3.67283e+07	3.67736e+07	3.35933e+06
	Stamen	1.18602e+08	7.71816e+06	1.97717e+09	8.25444e+07	4.61287e+09	2.88257e+08	1.82332e+08	1.09469e+07
	Ovary	1.77887e+09	1.85035e+08	1.00427e+10	8.23579e+08	1.8823e+10	1.46461e+09	2.29326e+08	3.93291e+07
	Style	3.96315e+08	2.70216e+08	3.04183e+09	3.52058e+08	1.30808e+10	8.78602e+08	3.78534e+07	7.65286e+06
Figure 4-Figure supplement 2D		Malonylation percentage
	S1-leaf	152.91	3.29488
	Sepal	140.466	1.03039
	Corolla	117.143	1.94358
	Stamen	170.509	0.143983
	Ovary	156.562	1.98132
	Style	177.543	3.31809
