# Supplementary material for: The decoration of specialized metabolites influences stylar development
Source: eLife journal article supplement (doi:10.7554/elife.38611), 2018-10-05
Supplement: supp [file elife-38611-supp-v1.zip › elife_poa_e38611_Figure_5_source_data_1.xlsx]

## Sheet: Tabelle1
		Figure 5-Source data 1. The short styles of VIGS-MaT1 flowers are associated with reduced IAA biosynthesis.
Figure 5A			Tryptophane
		EV-EV	119.321	14.9623
		EV-MaT1	320.639	68.2715
		irGGPPS-EV	123.76	21.4596
		irGGPPS-MaT1	176.449	14.473
Figure 5B			IAA content
		EV-EV	24.9974	1.6705
		EV-MaT1	14.9937	1.23274
		irGGPPS-EV	24.2484	1.793
		irGGPPS-MaT1	25.3184	2.41036
Figure 5C			TAA1 activity								YUC activity
		Substrates	Protein	VIGS-EV		VIGS-MaT1				Substrates	Protein	VIGS-EV		VIGS-MaT1
		+	-	0	0	0	0			+	-	0	0	0	0
		+	+	6.93606	1.12799	7.70682	0.52678			+	+	4.9095	0.302925	3.75358	0.115734
		-	-	0	0	0	0			-	-	0	0	0	0
		-	+	0	0	0	0			-	+	0	0	0	0
Figure 5D			Style length
			VIGS-EV		VIGS-MT1
		Con	21.1875	0.227646	10.3	0.707479
		IAA	20.7727	0.246463	18	0.46291
Figure 5E			Malonylation percentage
			VIGS-EV		VIGS-MaT1
		Con	171.195	2.36133	119.42	2.23269
		IAA	168.836	0.692488	125.467	3.39529
