# Supplementary material for: The decoration of specialized metabolites influences stylar development
Source: eLife journal article supplement (doi:10.7554/elife.38611), 2018-10-05
Supplement: supp [file elife-38611-supp-v1.zip › elife_poa_e38611_Figure_5_source_data_2.xlsx]

## Sheet: Tabelle1
	Figure 5-Source data 2. Relative abundance of flavonoid in NaMaT1 and/or NaGGPPS silenced plants
Figure 5-Figure supplement 1A		VIGS-EV		VIGS-MaT1
	KGR	1.0454e+07	1.07581e+06	1.31843e+07	1.26748e+06
	Rutin	7.01858e+08	8.48097e+07	9.44178e+08	8.83835e+07
Figure 5-Figure supplement 1B		EV		VIGS-MaT1
	kaempferol-3-O-glucoside	964.109	79.1968	831.195	63.555
	kaempferol-3-O-glucose-rhamnose	14831.8	878.888	17454.7	1414.41
	Rutin	27129.8	1025.44	9437.05	754.304
Figure 5-Figure supplement 1C		KGR		Rutin
	irGGPPS	2.81605e+07	1.46561e+06	1.09878e+09	6.00877e+07
	EV	2.4769e+07	3.21884e+06	1.208e+09	1.69993e+08
Figure 5-Figure supplement 1D		EV		irGGPPS
	KG	3.46648e+07	6.4323e+06	2.9128e+07	3.86007e+06
	KGR	4.42507e+08	9.50501e+07	3.70935e+08	6.29095e+07
	Rutin	3.28976e+09	4.70944e+08	3e+09	2.96605e+08
Figure 5-Figure supplement 1E		EV-EV		EV-MaT1		irGGPPS-EV		irGGPPS-MaT1
	KG	7.54271e+07	3.04086e+06	3.898e+07	6.00845e+06	6.01603e+07	8.09303e+06	5.50864e+07	1.54381e+07
	KGR	1.0521e+09	2.88262e+07	9.04792e+08	6.27253e+07	9.42863e+08	1.12181e+08	7.57886e+08	7.64196e+07
	Rutin	5.66973e+09	3.41259e+08	5.17344e+09	3.90576e+08	5.06405e+09	5.43159e+08	4.34615e+09	2.23829e+08
