# Supplementary material for: The decoration of specialized metabolites influences stylar development
Source: eLife journal article supplement (doi:10.7554/elife.38611), 2018-10-05
Supplement: supp [file elife-38611-supp-v1.zip › elife_poa_e38611_Figure_5_source_data_3.xlsx]

## Sheet: Tabelle1
	Figure 5-Source data 3. Brassinosteroid does not contribute to the VIGS-MaT1 short style.
Figure 5-Figure supplement 2A		Relative expression level
		VIGS-EV		VIGS-MaT1
	EV	1.01266	0.0681989	0.695087	0.0688746
	irGGPPS	0.700655	0.0547076	0.807945	0.0472913
Figure 5-Figure supplement 2B		NIATv7_g25593
		VIGS-EV		VIGS-MaT1
	EV	1.09632	0.223797	7.71291	2.27299
	irGGPPS	0.878536	0.146212	0.750002	0.230653
Figure 5-Figure supplement 2C		NIATv7_g39189
		VIGS-EV		VIGS-MaT1
	EV	1.48712	0.371763	1.72405	0.333939
	irGGPPS	1.25898	0.131528	1.06499	0.184325
Figure 5-Figure supplement 2D		Style length
	Control	9.3125	1.00418
	10 µM BR	9.6875	1.22816
