# Supplementary material for: The decoration of specialized metabolites influences stylar development
Source: eLife journal article supplement (doi:10.7554/elife.38611), 2018-10-05
Supplement: supp [file elife-38611-supp-v1.zip › elife_poa_e38611_Figure_6_source_data_1.xlsx]

## Sheet: Tabelle1
	Figure 6-Source data 1. The short styles of jasmonate-deficient irAOC plants result from disturbed DTG malonylation status.
Figure 6A		Malonylation percentage
	EV	176.237	0.629119
	irAOC	183.44	0.456352
Figure 6B		Style length
		VIGS-EV		VIGS-MaT1
	EV	22.5119	0.210841	11.2619	0.562387
	irAOC	14.4762	0.459221	11.0238	0.638729
Figure 6C		Malonylation percentage
		VIGS-EV		VIGS-MaT1
	EV	169.456	0.725607	119.42	2.23269
	irAOC	177.964	1.07771	116.906	0.524578
Figure 6D		Style length
		Con		MeJA
	EV-EV	21.2115	0.157317	21.2188	0.262078
	EV-MaT1	8.93478	0.458025	9.75	0.391496
	irAOC-EV	12.1458	0.228176	14.9688	0.443633
	irAOC-MaT1	9.61765	0.410186	10.075	0.336927
Figure 6E		Style length
	EV	28.3733	0.10105
	irGGPPS X EV	28.4333	0.196143
	irAOC X EV	17.3111	0.240627
	irGGPPS X irAOC	28.6	0.267966
Figure 6F		IAA content
	EV	19.4798	0.865609
	irAOC	12.7808	0.534161
Figure 6G		IAA product
	EV	5.74886	0.252263
	irAOC	4.92343	0.0527595
Figure 6H		Style length
	Con	14.9231	0.560008
	IAA	19.0455	0.488293
