# Supplementary material for: The decoration of specialized metabolites influences stylar development
Source: eLife journal article supplement (doi:10.7554/elife.38611), 2018-10-05
Supplement: supp [file elife-38611-supp-v1.zip › elife_poa_e38611_Figure_6_source_data_2.xlsx]

## Sheet: Tabelle1
	Figure 6-Source data 2. DTG malonylation status and style length are affected by silencing a JA biosynthesis gene (AOC), and are partly recovered by exogenous applications of MeJA.
Figure 6-Figure supplement 1A		Malonylation percentage
		EV		irAOC
	Con	172.87	4.45957	233.211	1.45975
	W+OS	166.041	2.28293	222.126	7.75195
Figure 6-Figure supplement 1B		Malonylation percentage
		EV		irAOC
	Stage 1	126.661	4.79722	153.954	1.72347
	Stage 3	132.16	5.09669	161.367	1.51555
	Stage 5	143.849	3.7229	154.68	4.33696
Figure 6-Figure supplement 1C		Style length
		Con		MeJA
	EV	26.0938	0.09375	26.2188	0.128847
	irAOC	19.9583	0.836452	23.6208	0.270063
Figure 6-Figure supplement 1D		Malonylation percentage
		Con		MeJA
	EV	159.896	0.403546	159.054	1.20384
	irAOC	170.933	0.550665	167.363	0.0994647
