# Supplementary figures and images for: The decoration of specialized metabolites influences stylar development
Source: eLife journal article supplement (doi:10.7554/elife.38611), 2018-10-05

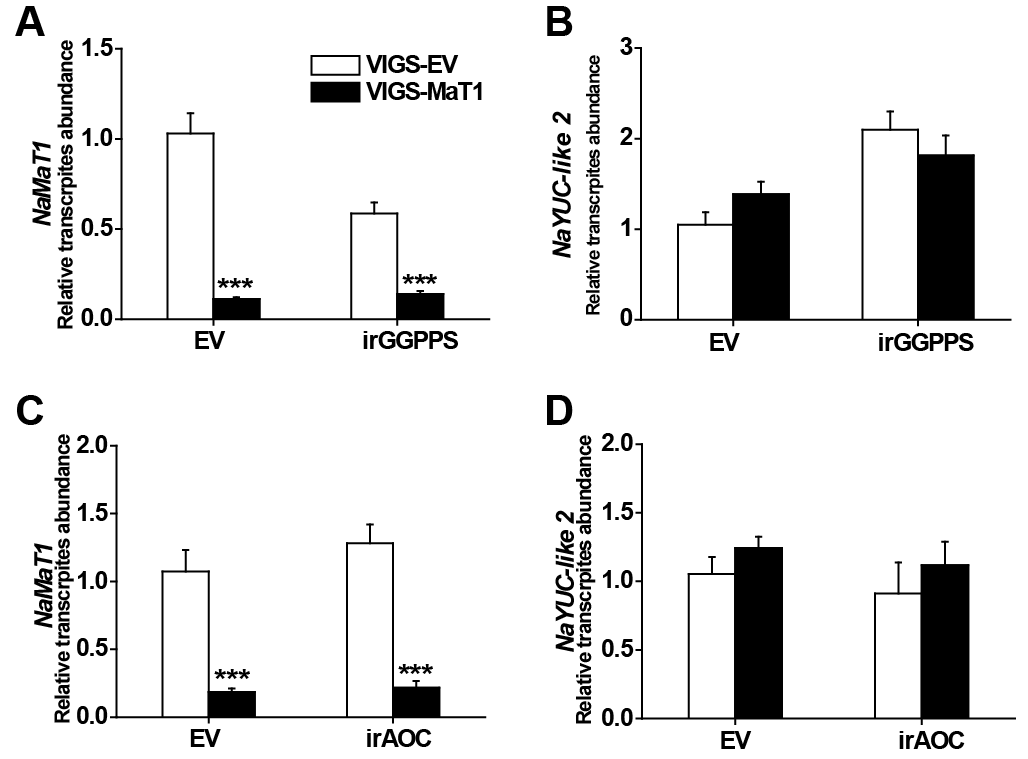

Supplement: supp [file elife-38611-supp-v1.zip › elife_poa_e38611_Figure_3_figure_supplement_3.tif]

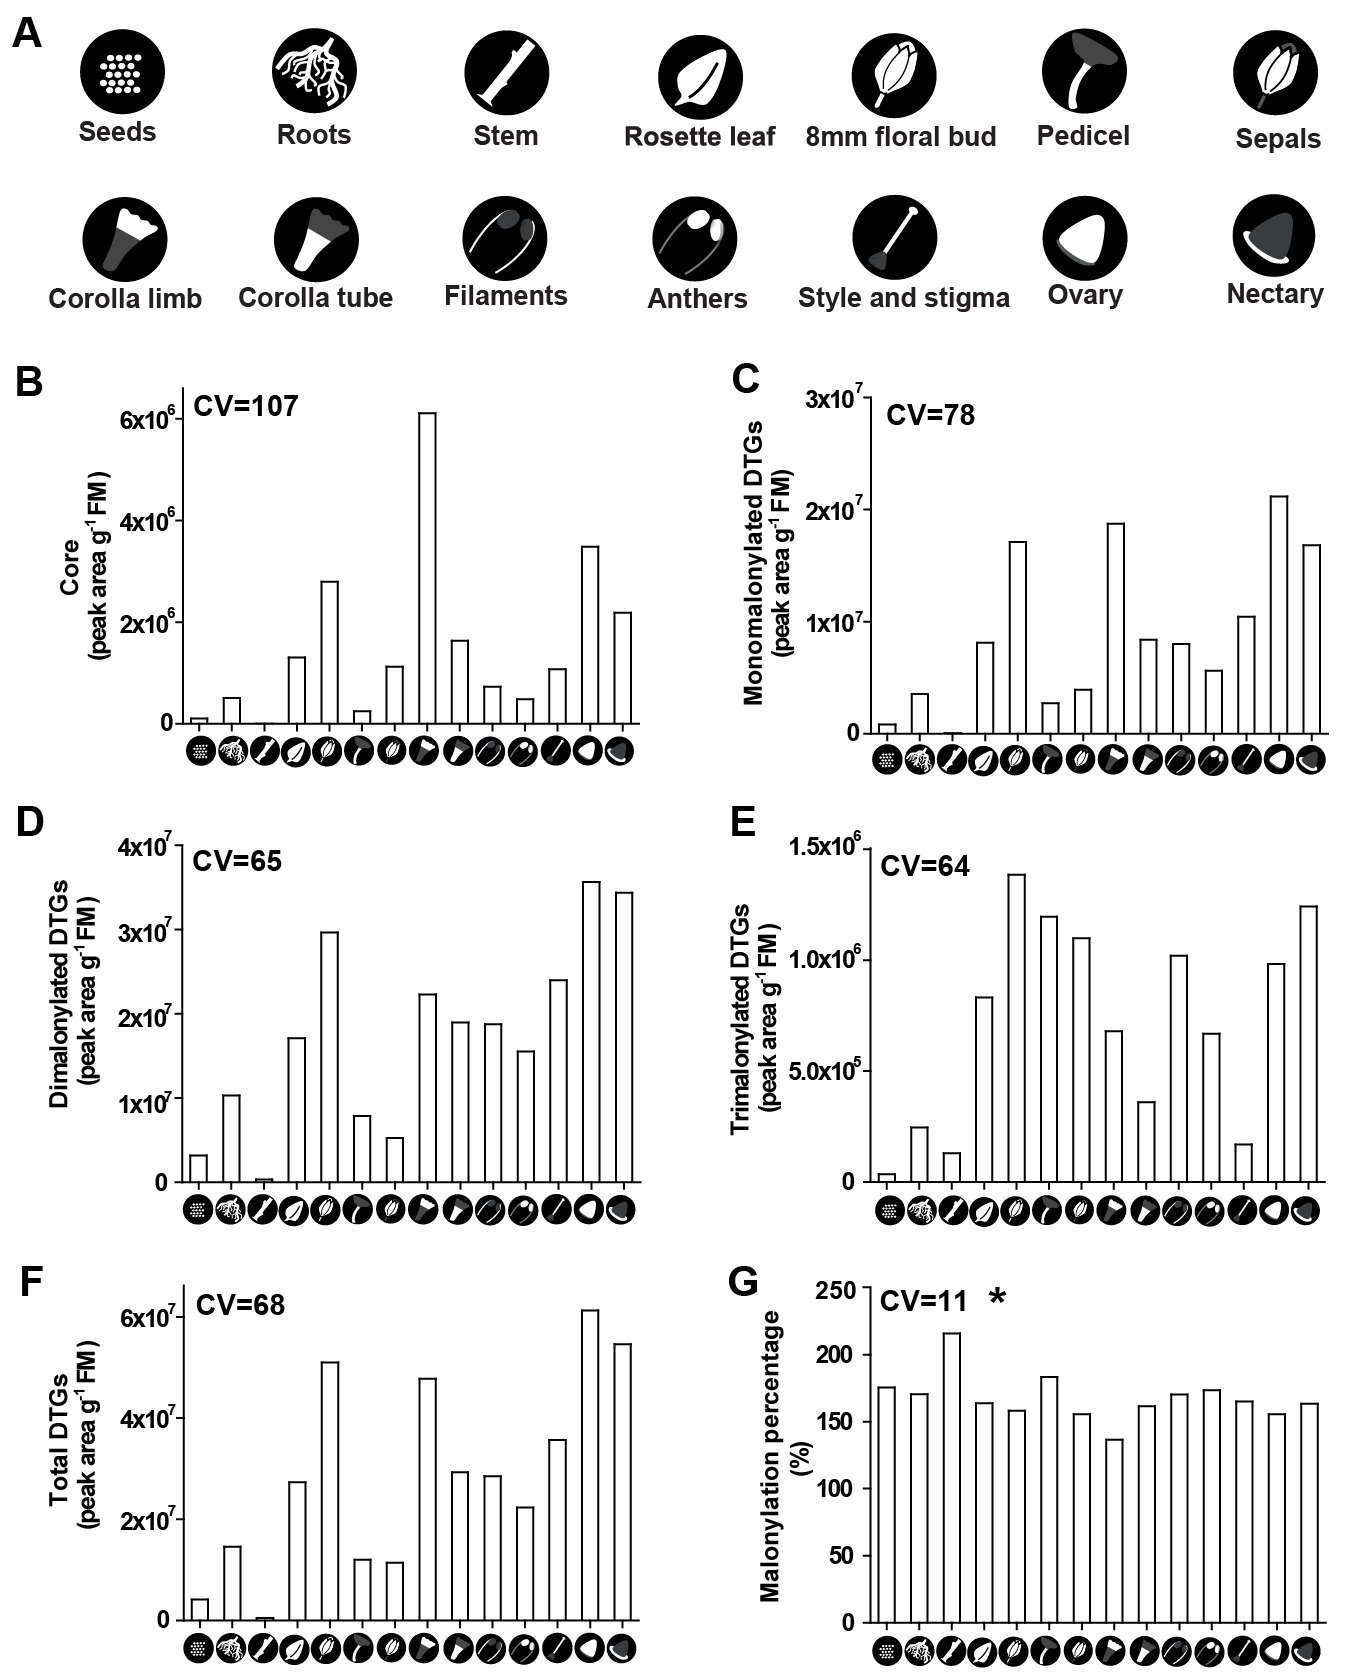

Supplement: supp [file elife-38611-supp-v1.zip › elife_poa_e38611_Figure_1_figure_supplement_2.tif]

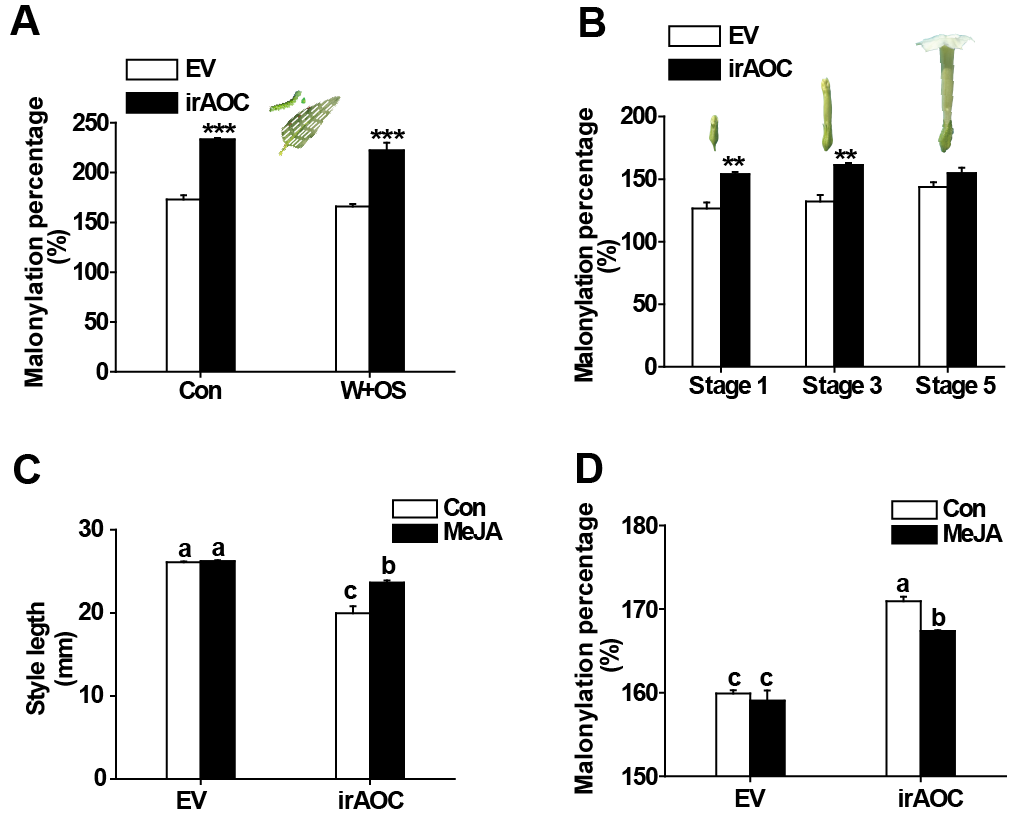

Supplement: supp [file elife-38611-supp-v1.zip › elife_poa_e38611_Figure_6_figure_supplement_1.tif]

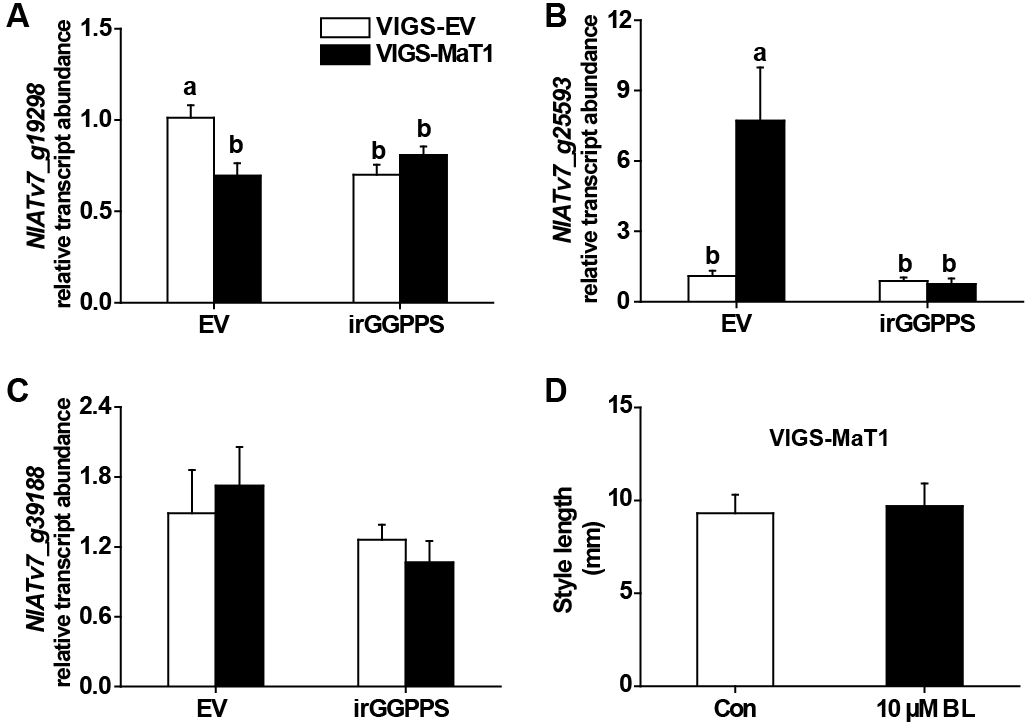

Supplement: supp [file elife-38611-supp-v1.zip › elife_poa_e38611_Figure_5_figure_supplement_2.tif]

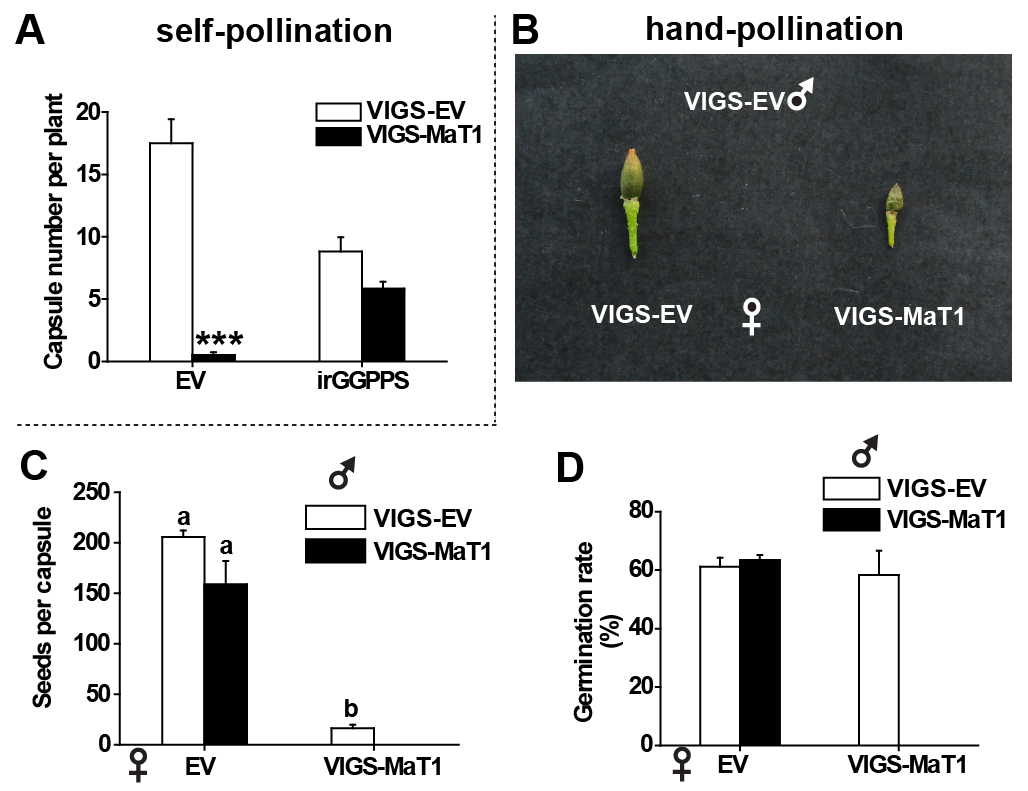

Supplement: supp [file elife-38611-supp-v1.zip › elife_poa_e38611_Figure_3_figure_supplement_2.tif]

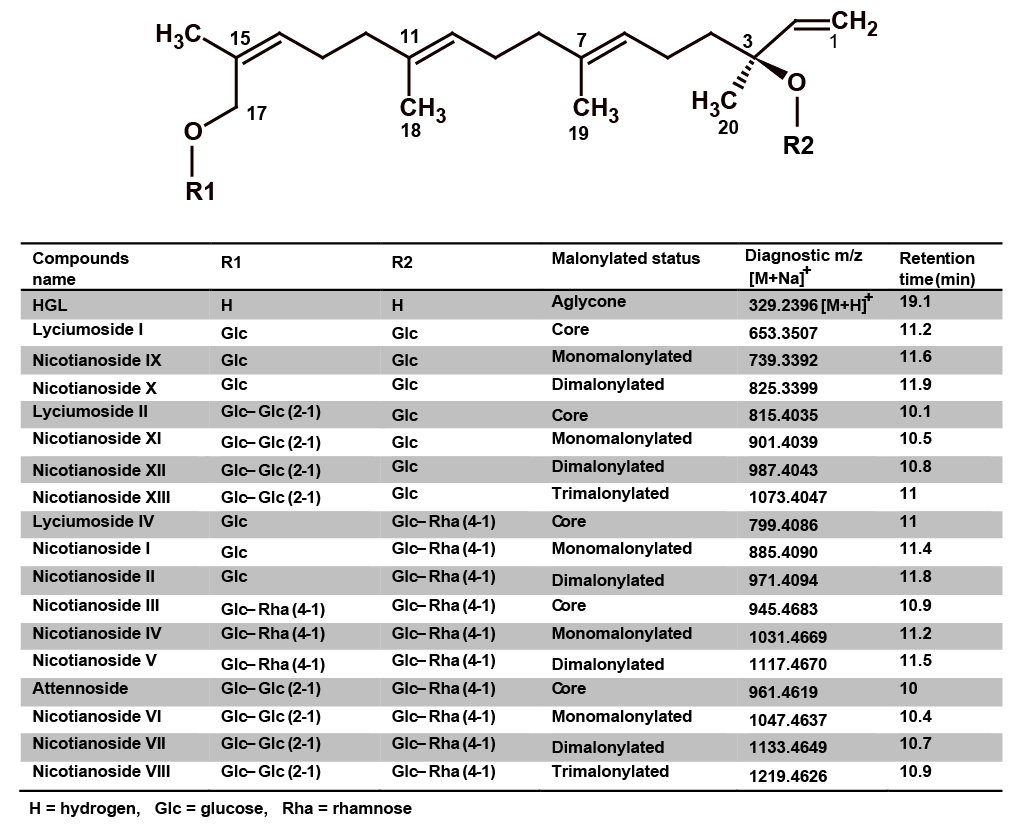

Supplement: supp [file elife-38611-supp-v1.zip › elife_poa_e38611_Figure_1_figure_supplement_1.tif]

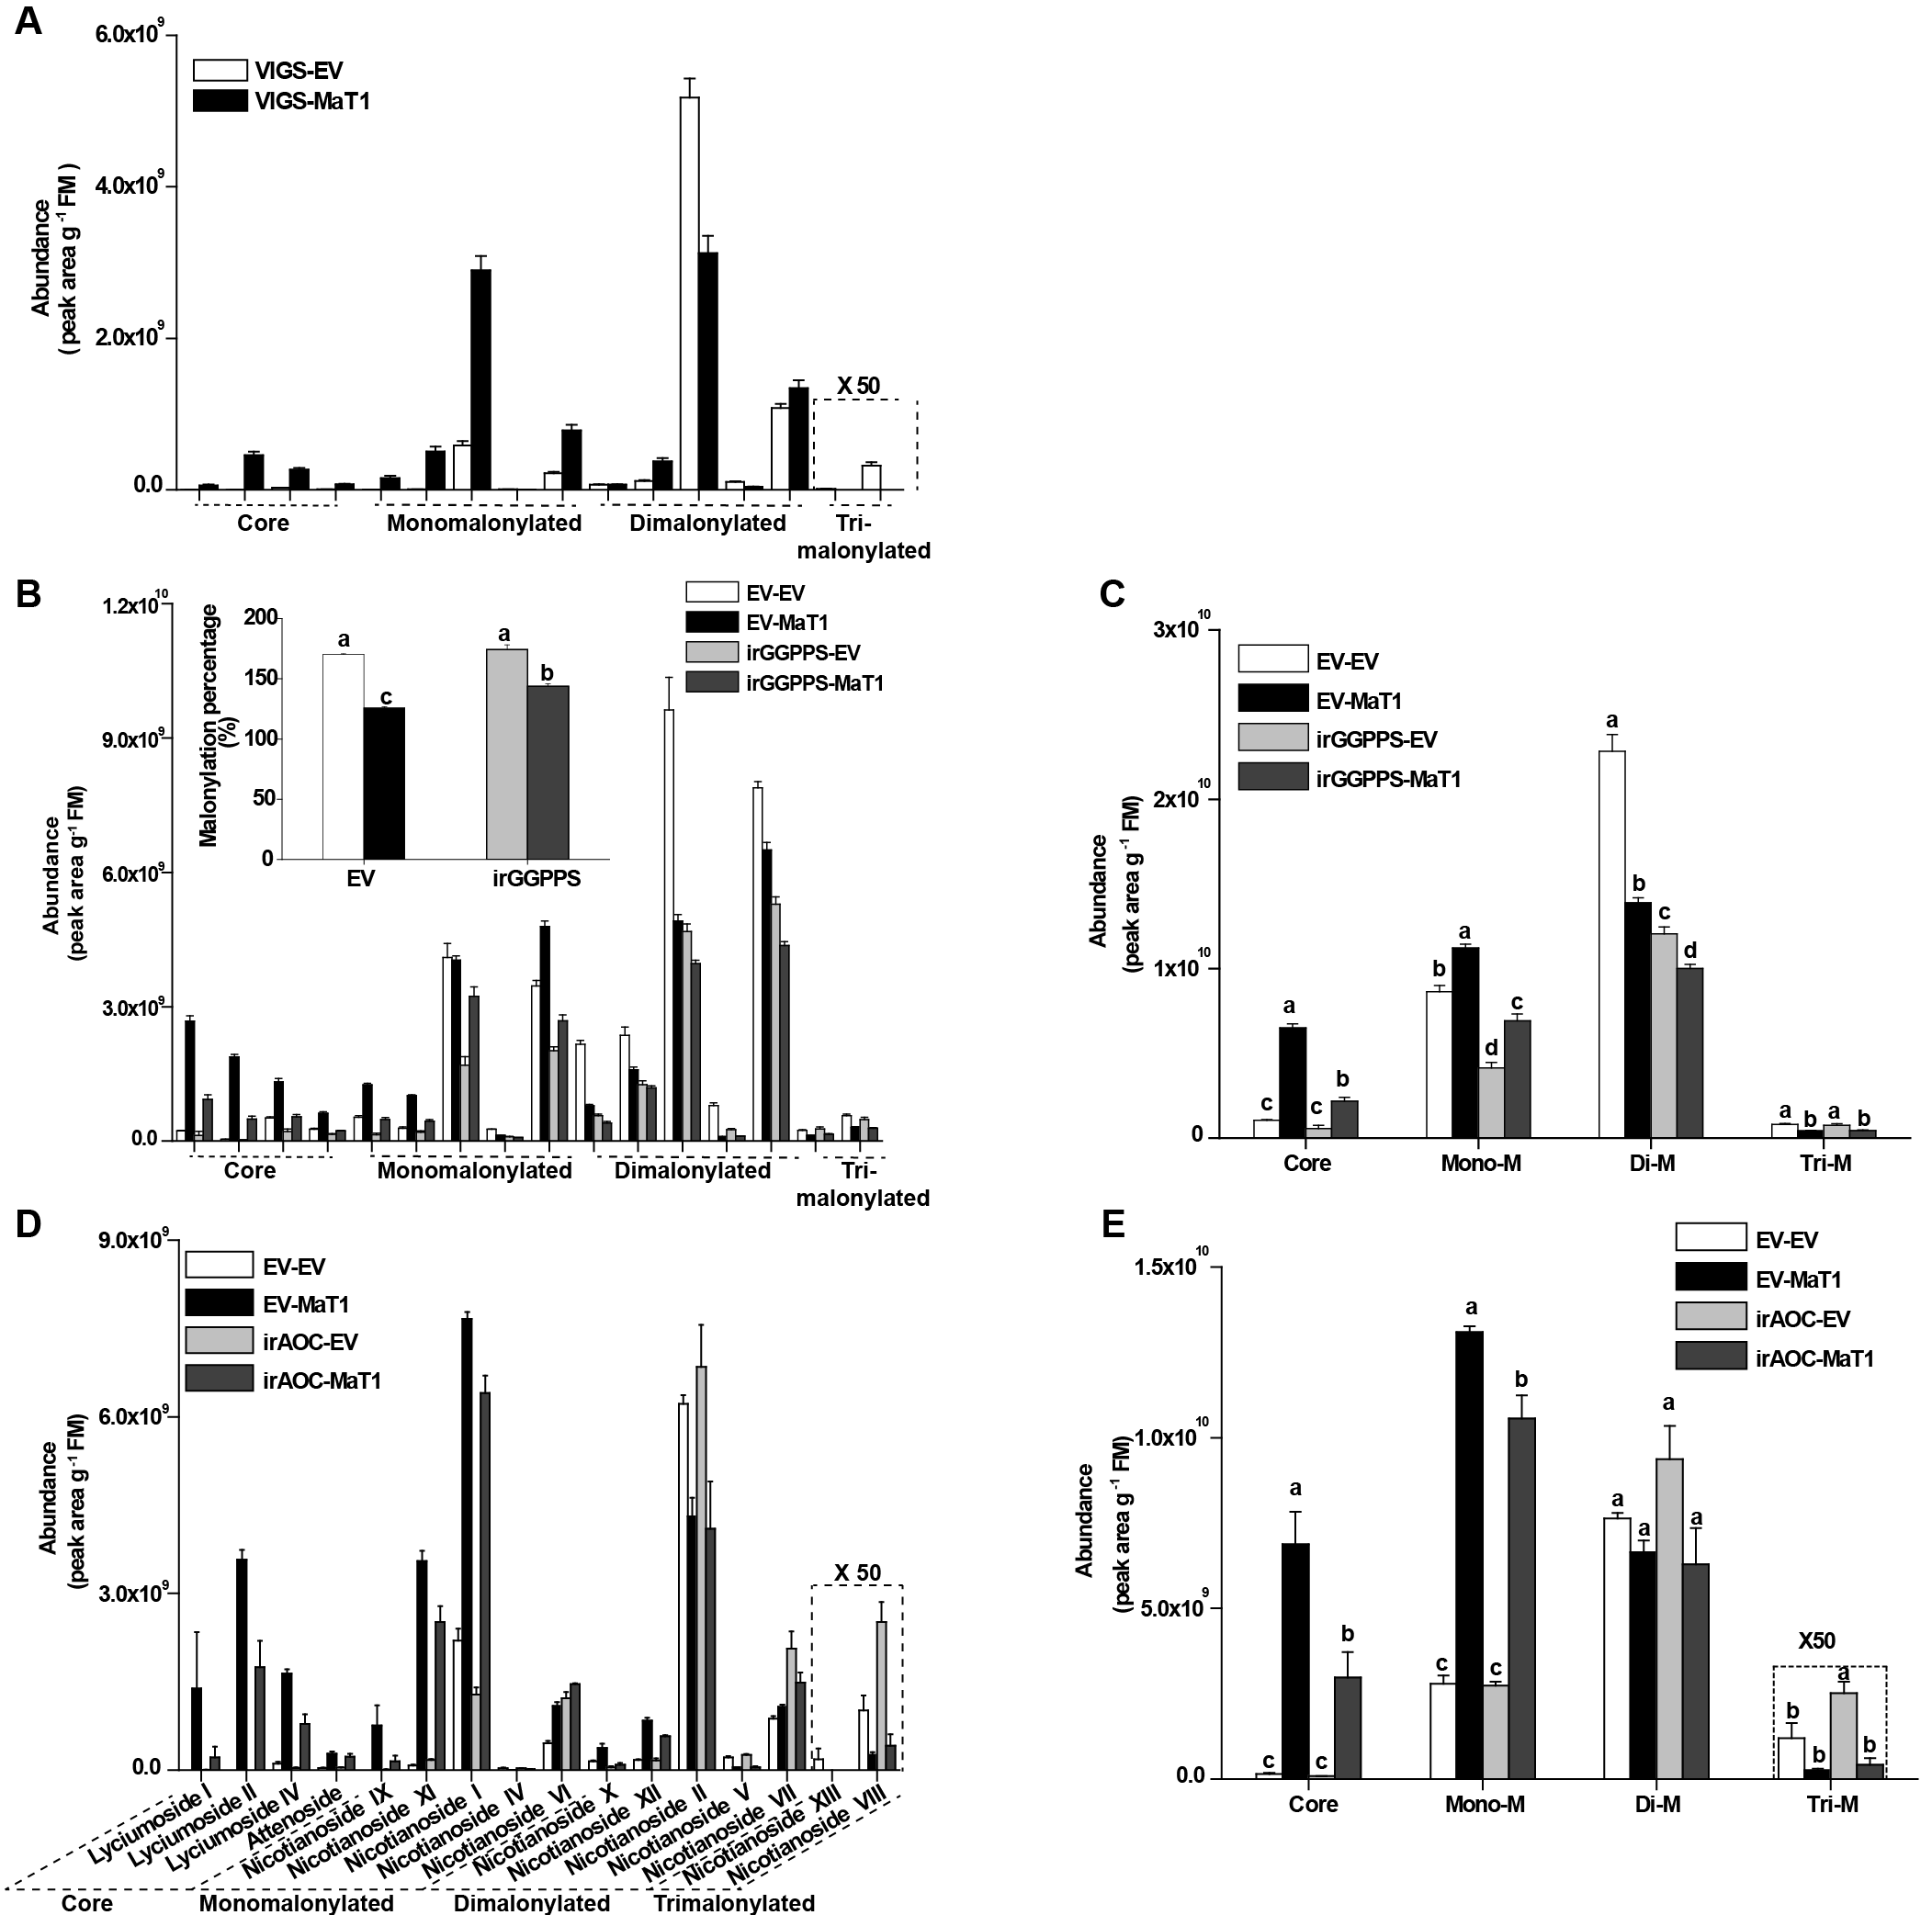

Supplement: supp [file elife-38611-supp-v1.zip › elife_poa_e38611_Figure_4_figure_supplement_1.tif]

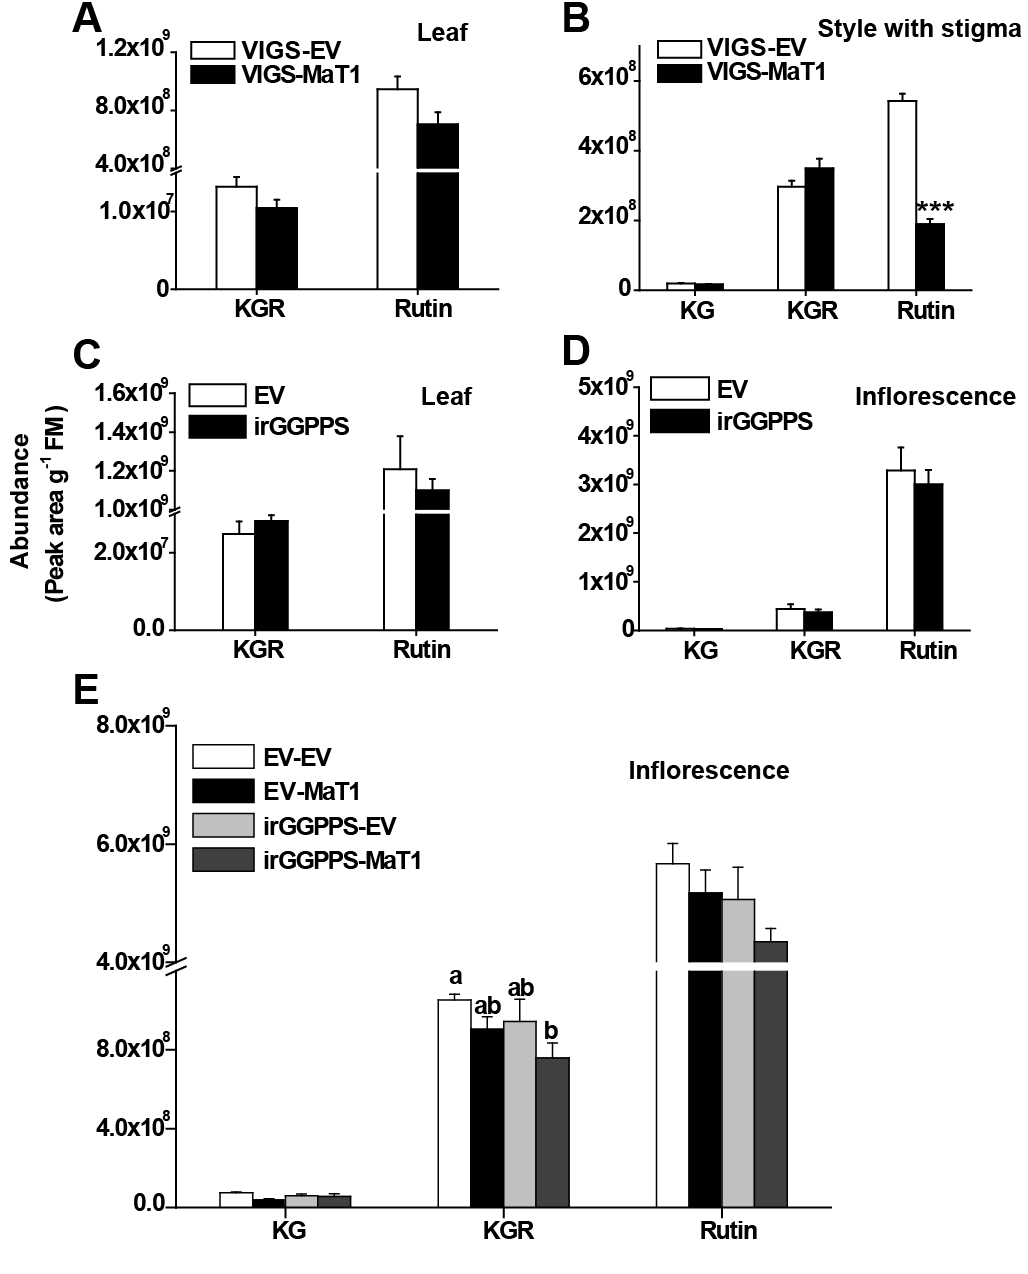

Supplement: supp [file elife-38611-supp-v1.zip › elife_poa_e38611_Figure_5_figure_supplement_1.tif]

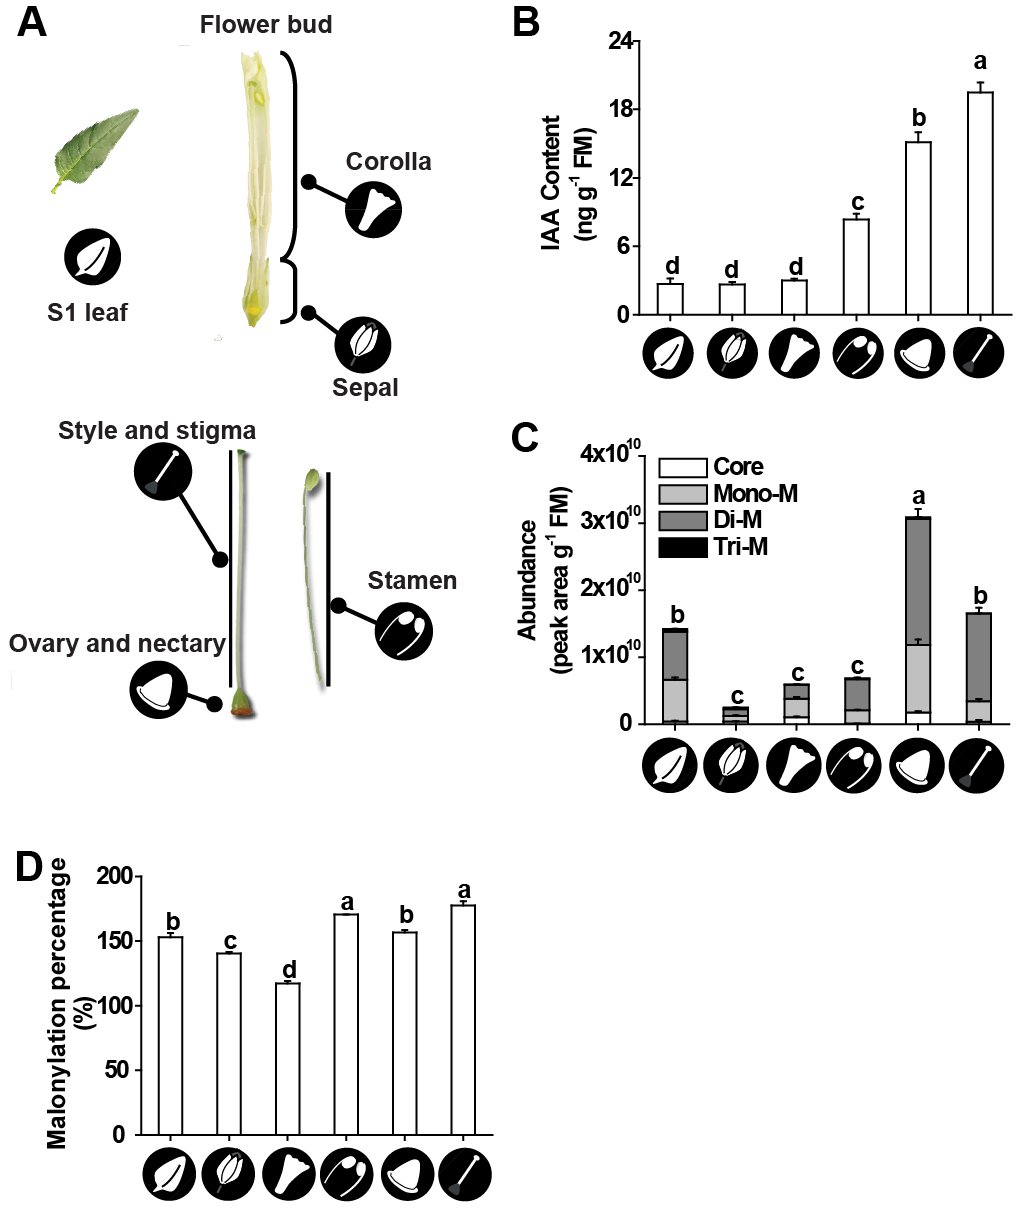

Supplement: supp [file elife-38611-supp-v1.zip › elife_poa_e38611_Figure_4_figure_supplement_2.tif]

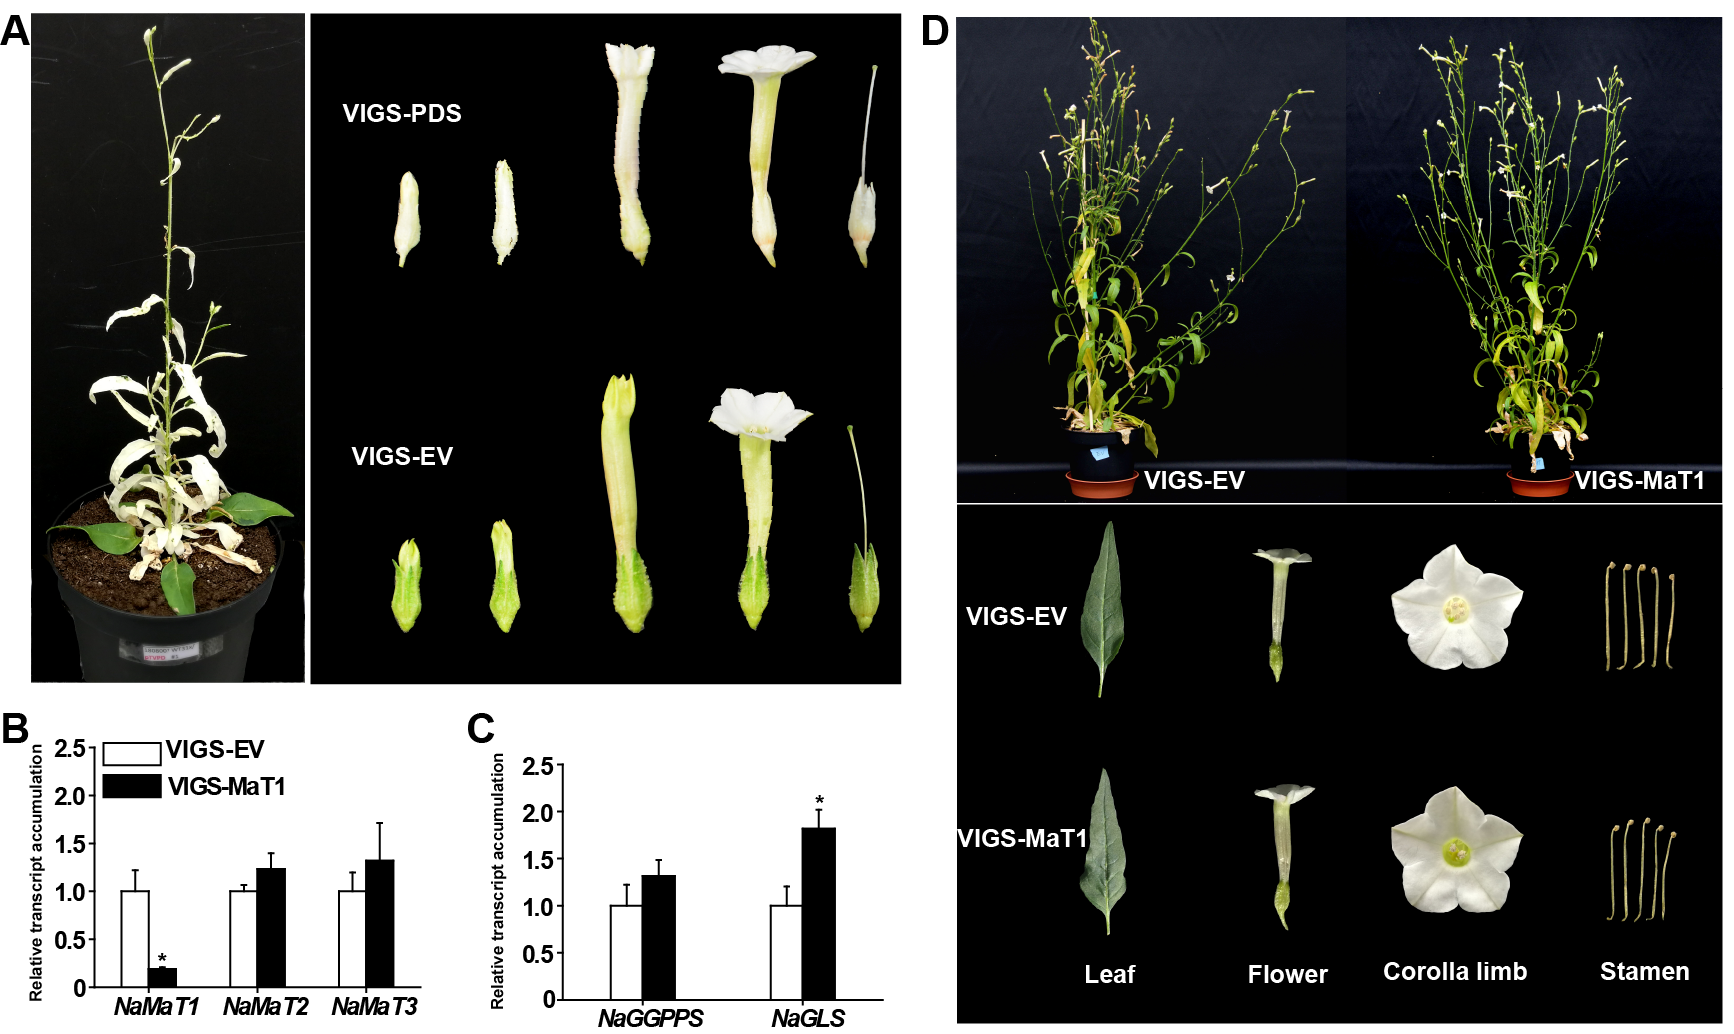

Supplement: supp [file elife-38611-supp-v1.zip › elife_poa_e38611_Figure_3_figure_supplement_1.tif]

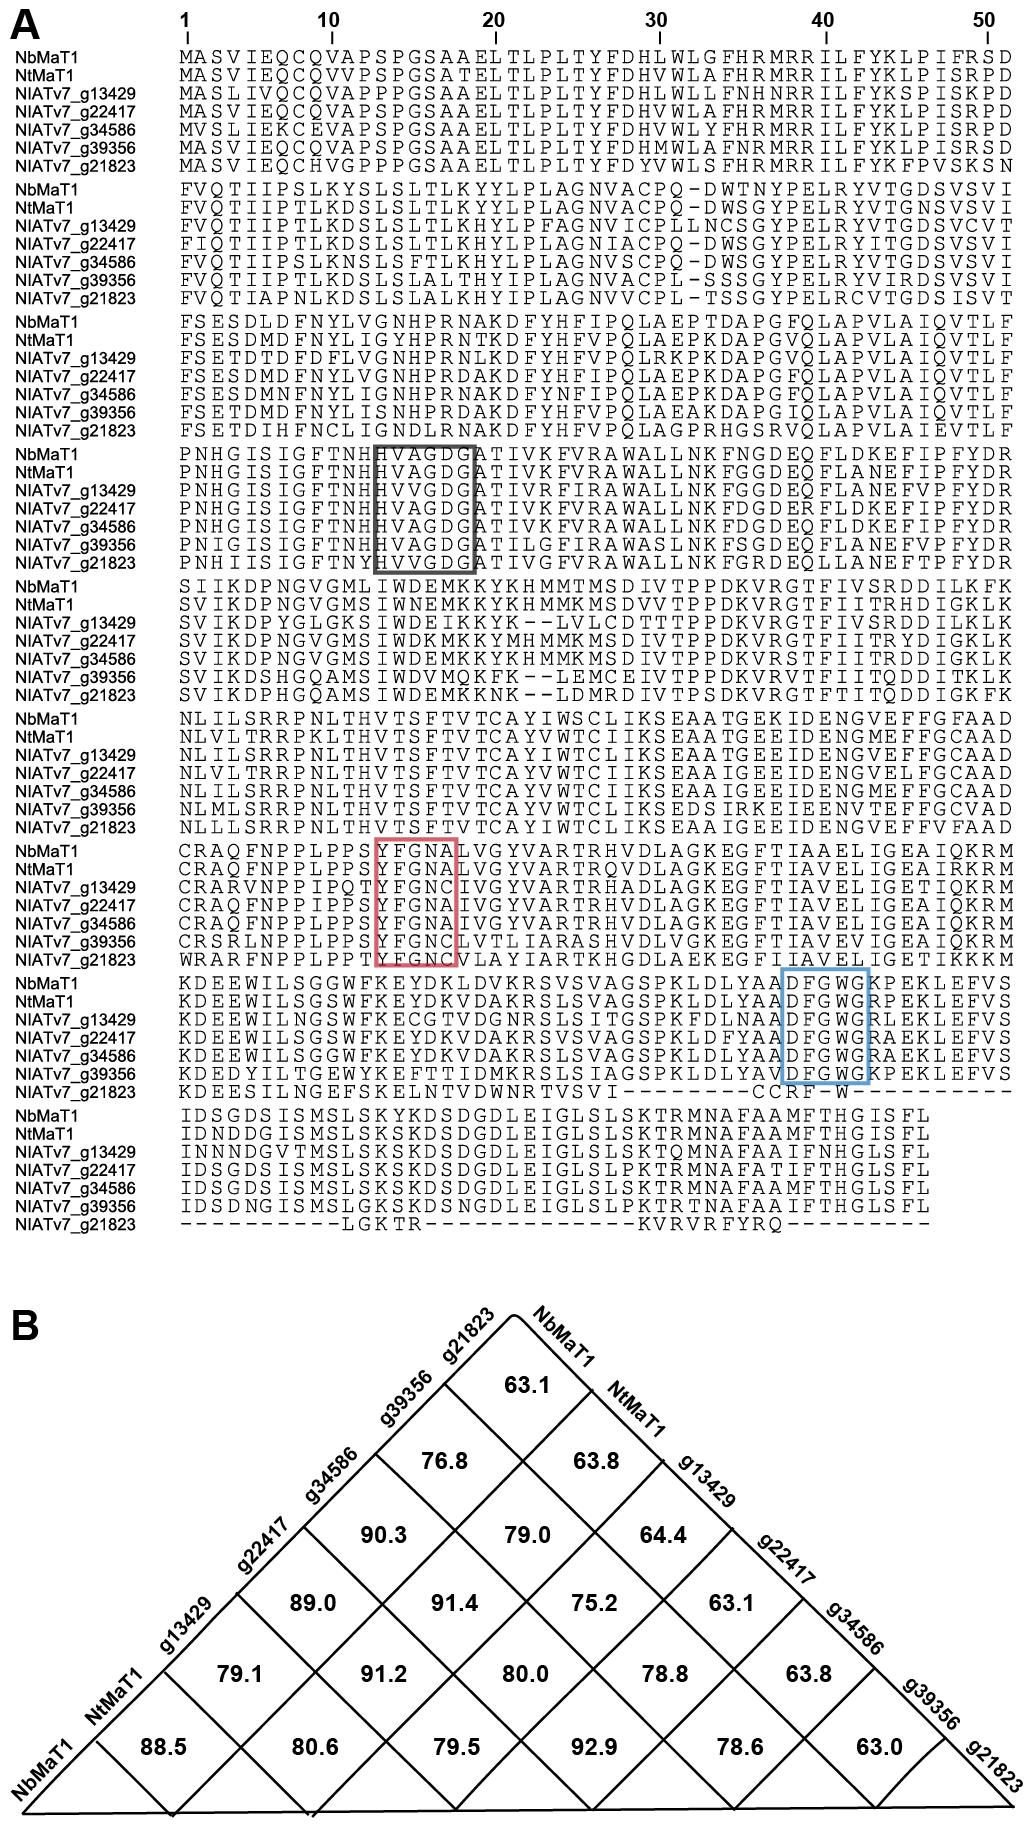

Supplement: supp [file elife-38611-supp-v1.zip › elife_poa_e38611_Figure_2_figure_supplement_1.tif]
